# Supplementary material for: In-cloud measurements highlight the role of aerosol hygroscopicity in cloud droplet formation
Source: Copernicus journal article supplement (doi:10.5194/acp-2016-318), 2016-04-21
Supplement: Supplementary file 1 [file acp-2016-318-supplement.zip]

Archive with 5 entries (5 files):
- Supplement.pdf
- Wind_sectors_120nm.pdf
- Wind_sectors_150nm.pdf
- Wind_sectors_80nm.pdf
- Wind_sector_summary.pdf
