# Supplementary material for: In-cloud measurements highlight the role of aerosol hygroscopicity in cloud droplet formation
Source: Copernicus journal article supplement (doi:10.5194/acp-2016-318), 2016-04-21
Supplement: Supplementary file 1 [file acp-2016-318-supplement.zip › Supplement.pdf]

## Supplementary information

### S1 Wind sector analysis

The HTDMA data was divided into wind sectors according to the criteria presented in Table S2. A nonparametric Kruskal-Wallis test was then applied to the data in order to see whether the sectors differed statistically significantly from each other. Finally, the sectional differences were identified by comparing the 95 % confidence intervals of the sectoral mean ranks. These tests were performed separately for each dry size ( $D_p = 80, 120$  and  $150$  nm) and for three different parameters:

- $GF_{avg}$  = Size-averaged growth factor
- $GF_{GF \geq 1.25}$  = Size-averaged GF of more hygroscopic particles
- $f_{GF < 1.25}$  = Number fraction of less hygroscopic particles

The Kruskal-Wallis test results are presented in Fig. S1 where the paired differences in mean ranks are plotted together with their 95 % confidence intervals. The bars are arranged in a way that the first three bars (from left to right) illustrate the variation within the polluted sector (wind sectors 1–3) and the last bar illustrates the difference between the two clean sectors (wind sectors 4–5). A simplified representation of the wind direction dependence is illustrated in Figs. S2–S4 where the wind sectors are colored according to the averaged HTDMA data using the map of Kuopio area as a background.

According to the results, the polluted sector was characterized by significantly higher  $f_{GF < 1.25}$  than the clean one, regardless of particle size. Similarly, the average GFs of more hygroscopic particles were significantly higher in the case of polluted sector with the only exception being the wind sector 1 at  $D_p = 150$  nm. Consequently, no clear trends were seen in the average GFs. Although some internal variation can be seen also within the polluted sector, more detailed analysis on the effect of wind direction and source appointment would be beyond the scope of the current manuscript.

**Table S1. HTDMA configuration.**

| Part               | Model/type                                             | Additional information                                                           |
|--------------------|--------------------------------------------------------|----------------------------------------------------------------------------------|
| Dryer              | Silica gel diffusion dryer                             | Length 900 mm, inner radius approximately 10 mm                                  |
| Charger            | <sup>85</sup> Kr bipolar diffusion charger             |                                                                                  |
| DMA1/DMA2          | Custom-made Vienna type DMA                            | Length 280 mm, outer radius 33 mm, inner radius 25 mm                            |
| DMA HV suppliers   | Fug HCE 7-12500                                        |                                                                                  |
| Particle counter   | TSI Model 3010 Condensation Particle Counter           | Sample flow 1 lpm                                                                |
| Sample flow sensor | Vaisala HUMICAP® Humidity and Temperature Probe HMP110 | Sample flow RH and temperature                                                   |
| Sheath flow sensor | EdgeTech DewMaster Chilled mirror hygrometer           | DMA2 sheath flow RH and temperature                                              |
| Humidifier         | Custom-made Gore-tex humidifier                        | Length 150 mm                                                                    |
| DMA Blowers        | Ebm-papst RG100/1100–2012                              | Controlled sheath/excess flow circulation for DMA1 and DMA2 (closed loop; 6 lpm) |
| Flow meters        | TSI Model 4143 Mass Flowmeter                          | Sheath/excess flow monitoring                                                    |

**Table S2. Wind sectors and their characteristics. Adapted from Portin et al. (2014).**

|   | Sector   | Source                 | Direction and distance from the station |
|---|----------|------------------------|-----------------------------------------|
| 1 | 0–45°    | Paper mill             | 35°, 5 km                               |
|   |          | Highway/Savilahti road | 6–45°, > 1.4 km                         |
| 2 | 45–155°  | City center            | 120–155°, 1.6–3.2 km                    |
|   |          | Residential areas      | 45–120°, 1.2–4 km                       |
|   |          | Highway/Savilahti road | 45–155°, 1–1.4 km                       |
| 3 | 155–215° | Heating plant          | 160°, 3.5 km                            |
|   |          | Residential areas      | 155–215°, 3.4–10 km                     |
|   |          | Highway/Savilahti road | 155–192°, > 1 km                        |
| 4 | 215–245° | Residential areas      | 215–245°, 3.4–4 km                      |
| 5 | 245–360° | Residential areas      | 245–360°, 1.5–3.5 km                    |

**Figure S1.** *Wind\_sector\_summary.pdf*

Comparison between the five wind sectors. Each row and column corresponds to different particle size and parameter, respectively. The bar plots illustrate the paired differences in mean ranks and the whiskers correspond to their 95 % confidence intervals. Therefore, if the confidence interval doesn't include zero, the difference between the wind sectors can be considered statistically significant (grey bars). Marked are also the test parameter ( $\chi^2$ ) and the level of significance ( $p$ ) obtained by Kruskal-Wallis test.

**Figure S2.** *Wind\_sectors\_80nm.pdf*

Top left: Map of the Kuopio area. Numbered are the Puijo tower (1), paper mill (2), city center (3), heating plant (4) and the highway/Savilahti road (5). Other panels: Wind sectors colored according to the 80 nm HTDMA data. Shown are the average GFs (top right), the average GFs of more hygroscopic particles (bottom left) and the number fractions of less hygroscopic particles (bottom right). Background map by OpenStreetMap contributors.

**Figure S3.** *Wind\_sectors\_120nm.pdf*

Top left: Map of the Kuopio area. Numbered are the Puijo tower (1), paper mill (2), city center (3), heating plant (4) and the highway/Savilahti road (5). Other panels: Wind sectors colored according to the 120 nm HTDMA data. Shown are the average GFs (top right), the average GFs of more hygroscopic particles (bottom left) and the number fractions of less hygroscopic particles (bottom right). Background map by OpenStreetMap contributors.

**Figure S4.** *Wind\_sectors\_150nm.pdf*

Top left: Map of the Kuopio area. Numbered are the Puijo tower (1), paper mill (2), city center (3), heating plant (4) and the highway/Savilahti road (5). Other panels: Wind sectors colored according to the 150 nm HTDMA data. Shown are the average GFs (top right), the average GFs of more hygroscopic particles (bottom left) and the number fractions of less hygroscopic particles (bottom right). Background map by OpenStreetMap contributors.

**References**

Portin, H., Leskinen, A., Hao, L., Kortelainen, A., Miettinen, P., Jaatinen, A., Laaksonen, A., Lehtinen, K. E. J., Romakkaniemi, S., and Komppula, M.: The effect of local sources on particle size and chemical composition and their role in aerosol-cloud interactions at Puijo measurement station, *Atmos. Chem. Phys.*, 14, 6021-6034, 10.5194/acp-14-6021-2014, 2014.
