# Supplementary figures and images for: In-cloud measurements highlight the role of aerosol hygroscopicity in cloud droplet formation
Source: Copernicus journal article supplement (doi:10.5194/acp-2016-318), 2016-04-21

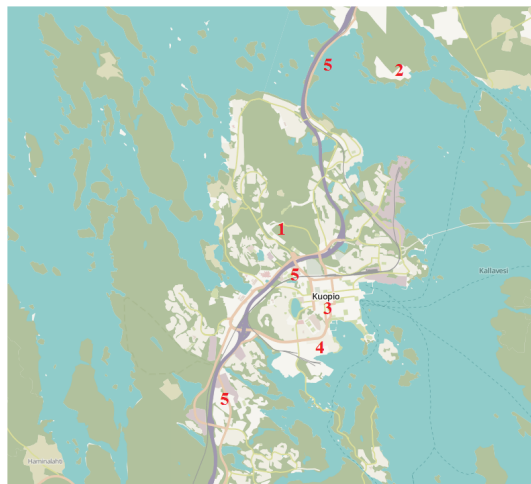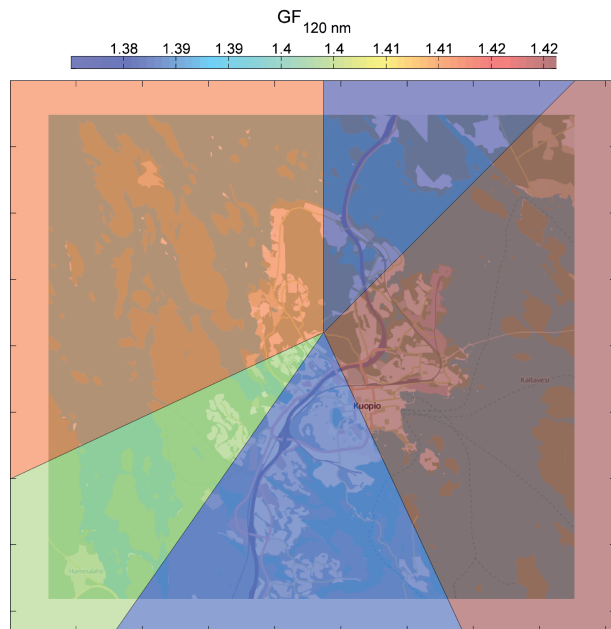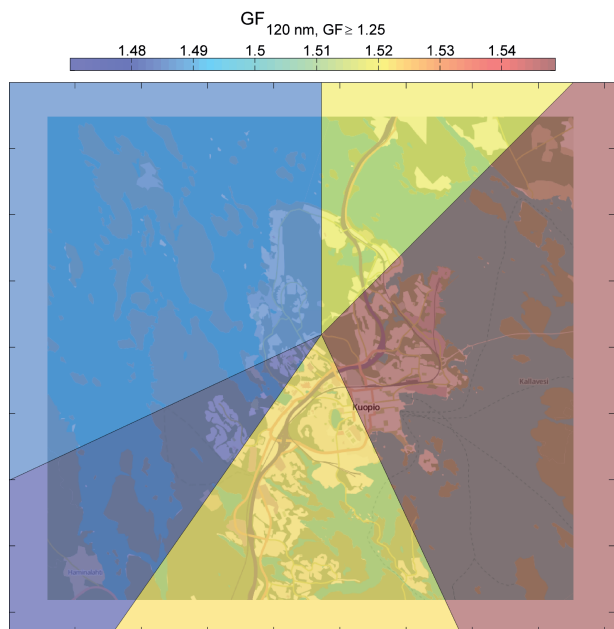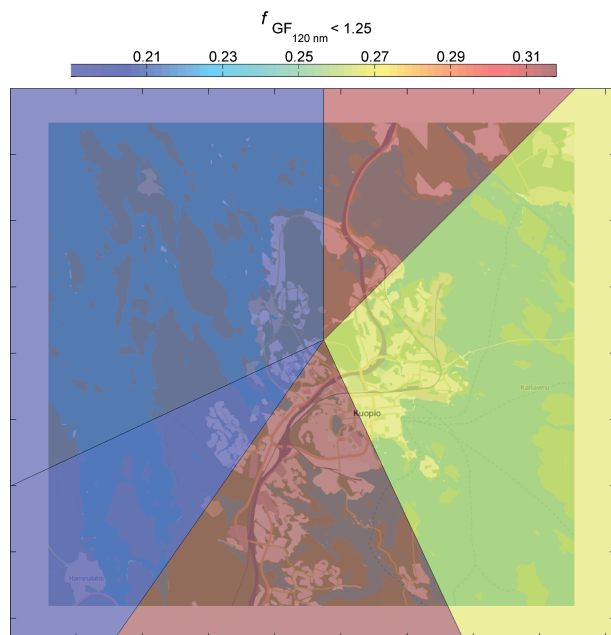

Supplement: Supplementary file 1 [file acp-2016-318-supplement.zip › Wind_sectors_120nm.pdf]

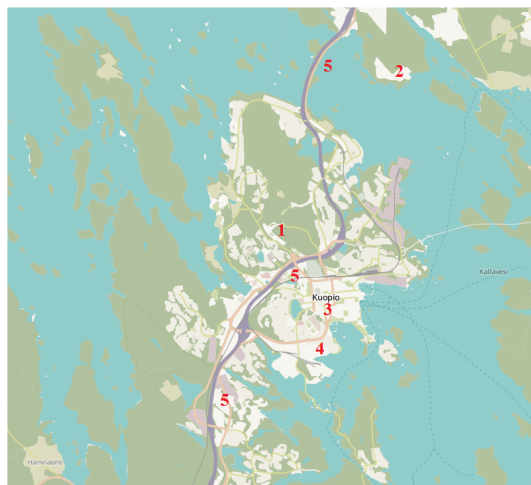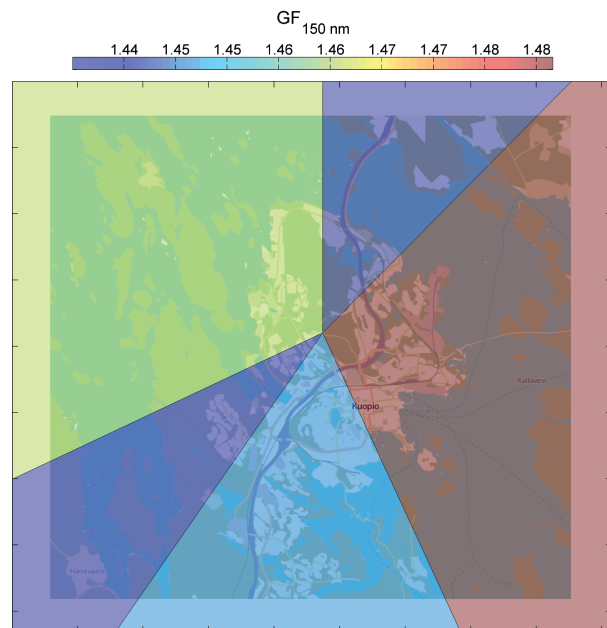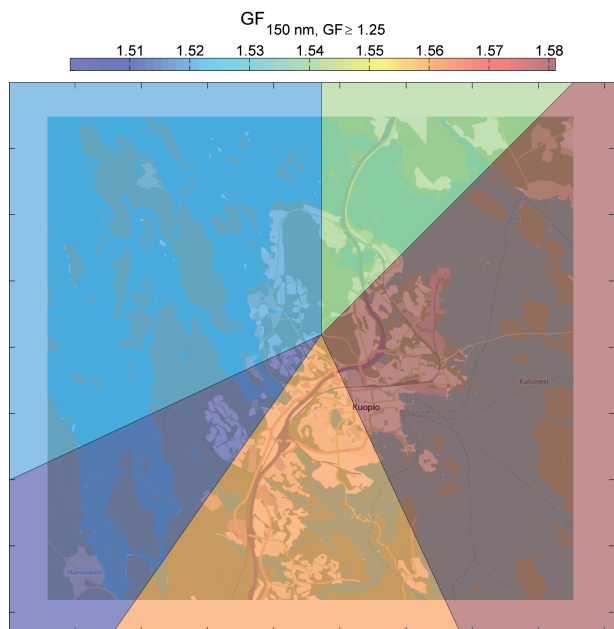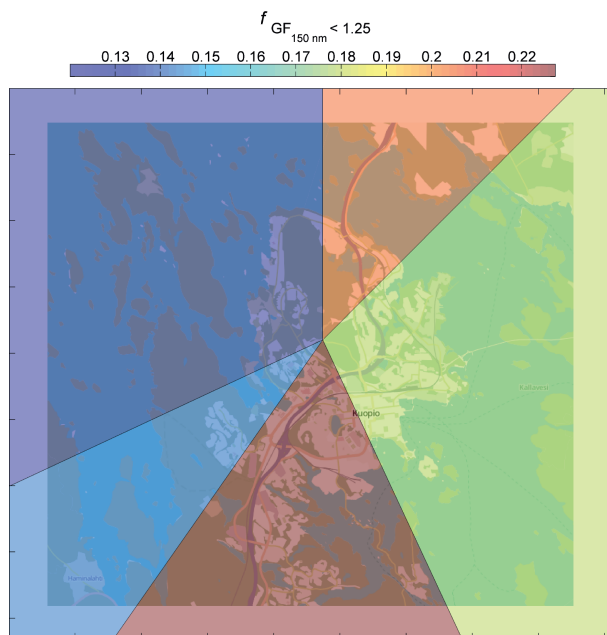

Supplement: Supplementary file 1 [file acp-2016-318-supplement.zip › Wind_sectors_150nm.pdf]

GF<sub>80 nm</sub>

1.26 1.27 1.28 1.29 1.3 1.31

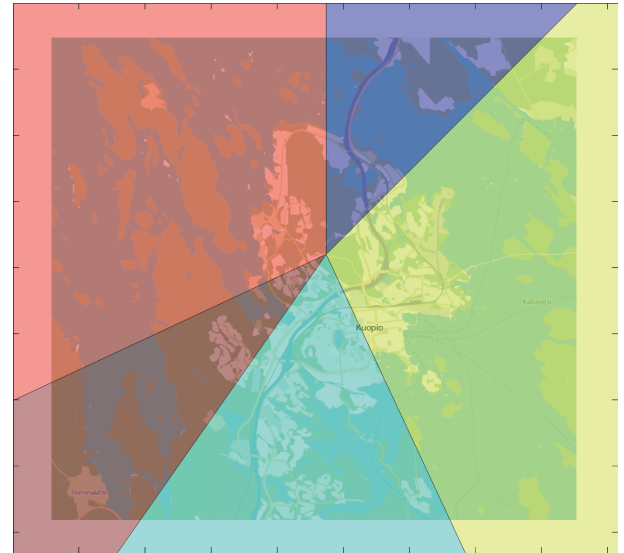

GF<sub>80 nm, GF ≥ 1.25</sub>

1.44 1.45 1.46 1.47 1.48 1.49 1.5 1.51

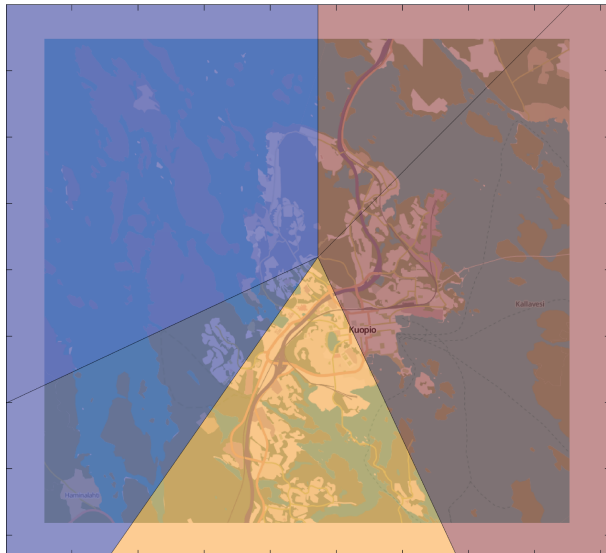

$f_{GF_{80 nm} < 1.25}$

0.38 0.4 0.42 0.44 0.46 0.48 0.5 0.52 0.54 0.56 0.58

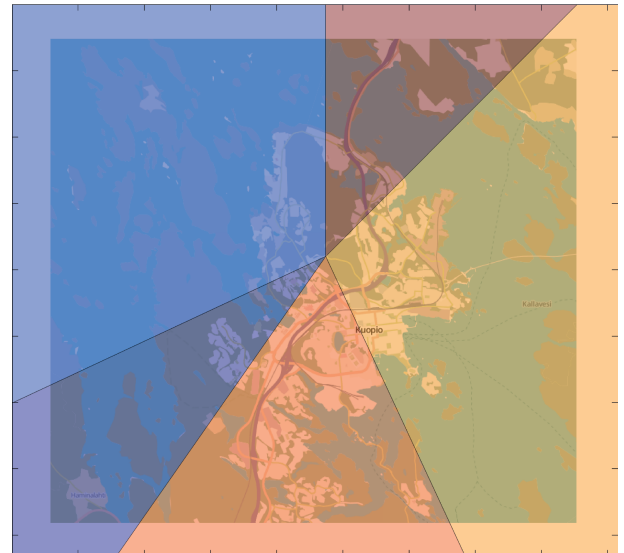

Supplement: Supplementary file 1 [file acp-2016-318-supplement.zip › Wind_sectors_80nm.pdf]

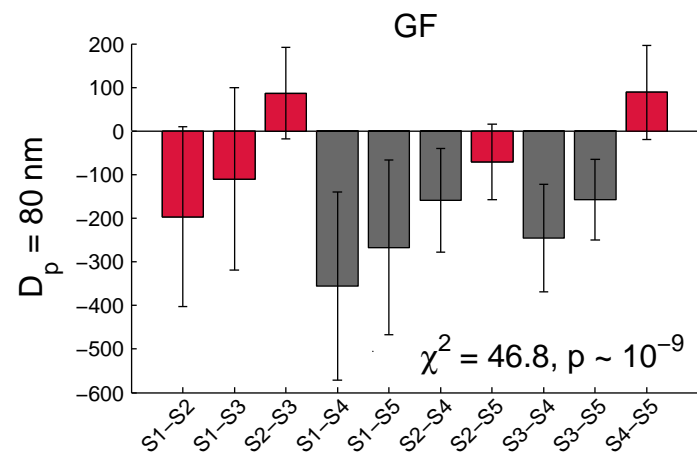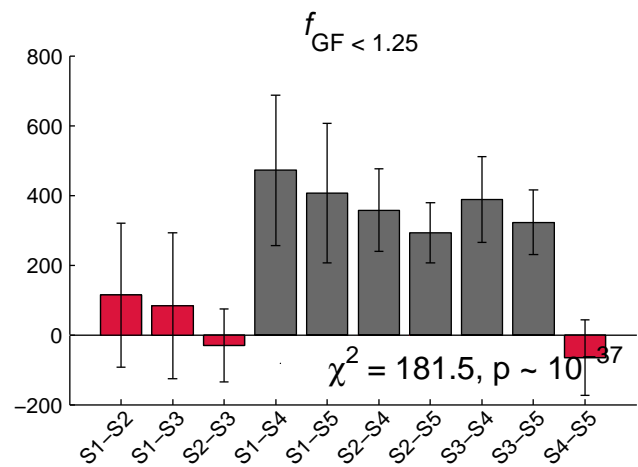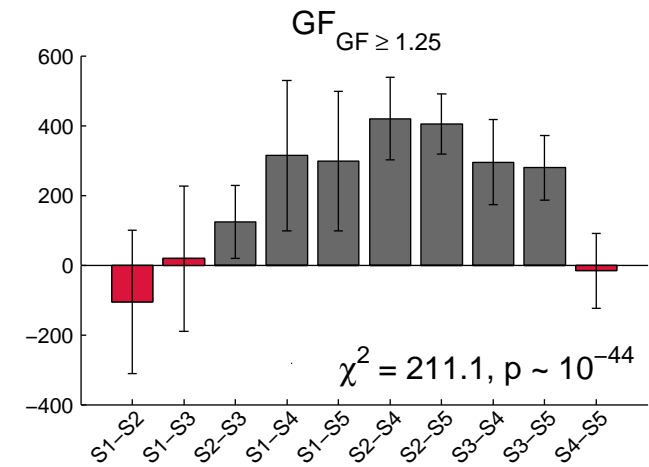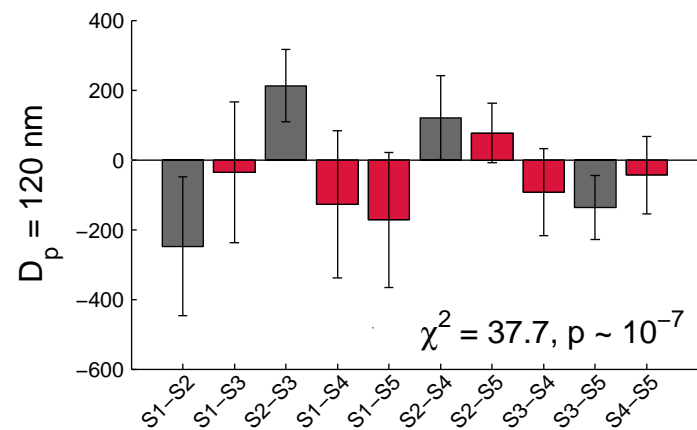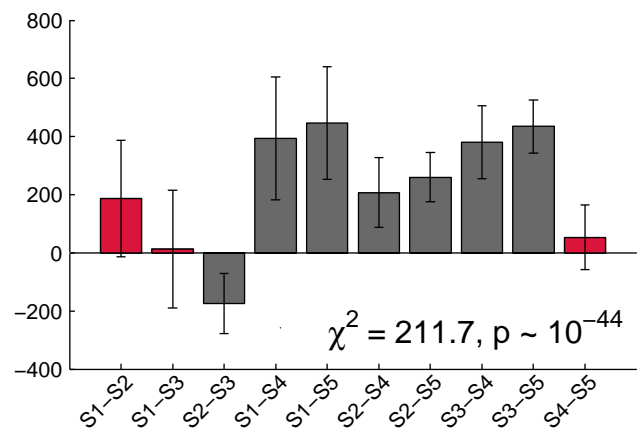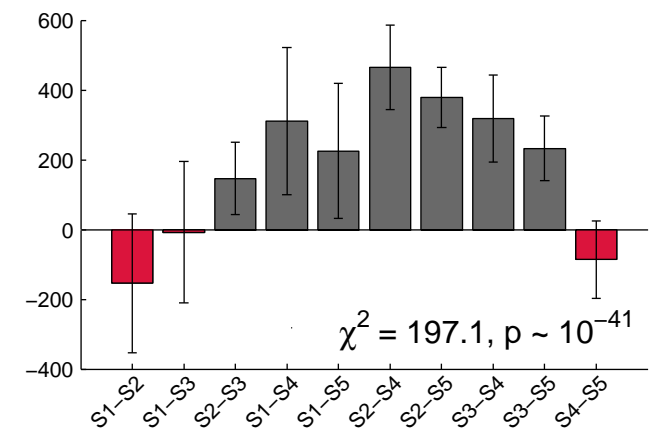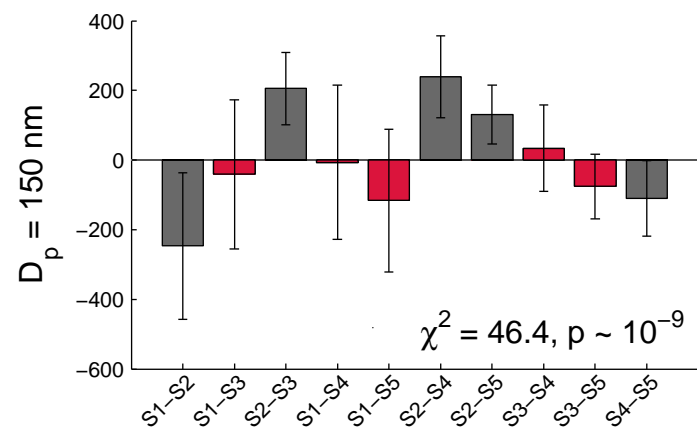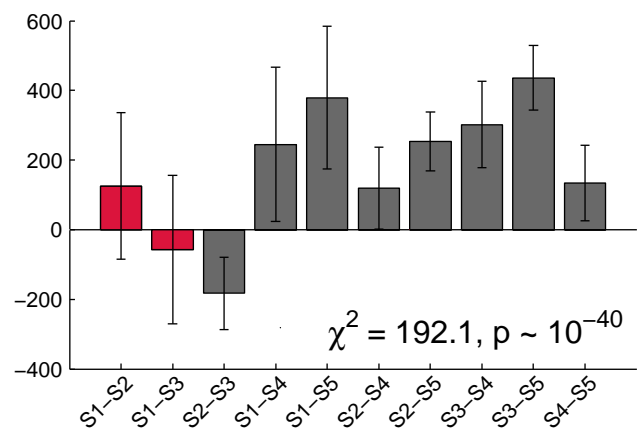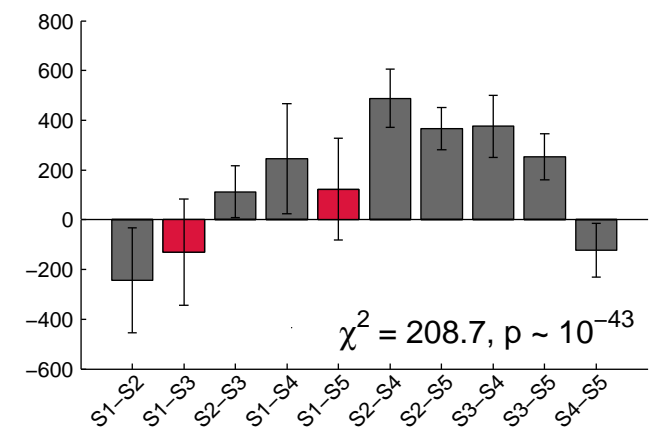

Supplement: Supplementary file 1 [file acp-2016-318-supplement.zip › Wind_sector_summary.pdf]
